# Supplementary material
Source: PubMed Central journal article supplement (PMC5729044)
Supplement: NIHMS875234-supplement-Sup_Info.pdf [file NIHMS875234-supplement-Sup_Info.pdf]

**Supplementary Video 1 | Cryo-EM tomographic reconstruction of a released EPN.** Shown is the raw charge density in different slices of the tomogram (first pass) and isosurface renderings (second pass) of individual protein nanocages (gold) and the limiting membrane of the EPN (green).

**Supplementary Video 2 | Single particle cryo-EM reconstruction of released EPN-01\* protein nanocage.** Shown are the raw charge density (grey, contoured at  $4.5 \sigma$ ) and a rigid body fitting of the I3-01 design model (dark green) plus one N-terminal amino acid (yellow) added to I3-01.

**Supplementary Table 1 | Description and experimental results of the 43 EPN constructs and 8 negative control constructs surveyed.**

| Construct                 | Membrane-binding element                                                       | Assembly element | ESCRT-recruiting element                 | Architecture*     | Release** |
|---------------------------|--------------------------------------------------------------------------------|------------------|------------------------------------------|-------------------|-----------|
| EPN-01                    | Myristoylation motif from HIV-1 <sub>NL4-3</sub> Gag                           | I3-01            | HIV-1 <sub>NL4-3</sub> p6 <sup>Gag</sup> | Myr-I3-01-p6      | Yes †     |
| EPN-02 (negative control) | Mutated myristoylation motif from HIV-1 <sub>NL4-3</sub> Gag(G <sub>2</sub> A) | I3-01            | HIV-1 <sub>NL4-3</sub> p6 <sup>Gag</sup> | Myr-I3-01-p6      | No        |
| EPN-03                    | Myristoylation motif from MARCKS‡                                              | I3-01            | HIV-1 <sub>NL4-3</sub> p6 <sup>Gag</sup> | Myr-I3-01-p6      | Yes †     |
| EPN-04                    | Myristoylation motif from Src kinase‡                                          | I3-01            | HIV-1 <sub>NL4-3</sub> p6 <sup>Gag</sup> | Myr-I3-01-p6      | No        |
| EPN-05                    | Myristoylation motif from neurocalcin‡                                         | I3-01            | HIV-1 <sub>NL4-3</sub> p6 <sup>Gag</sup> | Myr-I3-01-p6      | No        |
| EPN-06                    | Myristoylation motif from HIV-1 <sub>NL4-3</sub> Gag                           | I3-01            | HIV-1 <sub>NL4-3</sub> p6 <sup>Gag</sup> | Myr-p6-I3-01      | No        |
| EPN-07                    | Myristoylation/palmitoylation motif from Lyn kinase‡                           | I3-01            | HIV-1 <sub>NL4-3</sub> p6 <sup>Gag</sup> | MyrPalm-I3-01-p6  | Yes †     |
| EPN-08                    | Myristoylation/palmitoylation motif from Gαo‡                                  | I3-01            | HIV-1 <sub>NL4-3</sub> p6 <sup>Gag</sup> | MyrPalm-I3-01-p6  | Yes †     |
| EPN-09                    | Dual palmitoylation motif from GAP43‡                                          | I3-01            | HIV-1 <sub>NL4-3</sub> p6 <sup>Gag</sup> | PalmPalm-I3-01-p6 | Yes †     |
| EPN-10                    | Dual palmitoylation motif from PSD-95‡                                         | I3-01            | HIV-1 <sub>NL4-3</sub> p6 <sup>Gag</sup> | PalmPalm-I3-01-p6 | No        |
| EPN-11                    | Myristoylation/palmitoylation motif from Lyn kinase‡                           | I3-01            | HIV-1 <sub>NL4-3</sub> p6 <sup>Gag</sup> | MyrPalm-p6-I3-01  | Yes †     |
| EPN-12                    | Prenylation motif from K-Ras4B                                                 | I3-01            | HIV-1 <sub>NL4-3</sub> p6 <sup>Gag</sup> | I3-01-p6-Pren     | No        |

|                           |                                                                           |       |                                                                            |                     |               |
|---------------------------|---------------------------------------------------------------------------|-------|----------------------------------------------------------------------------|---------------------|---------------|
| EPN-13                    | Prenylation motif from K-Ras4B                                            | I3-01 | HIV-1 <sub>NL4-3</sub> p6 <sup>Gag</sup>                                   | p6-I3-01-Pren       | No            |
| EPN-14                    | Prenylation motif from paralemmin $\ddagger$                              | I3-01 | HIV-1 <sub>NL4-3</sub> p6 <sup>Gag</sup>                                   | p6-I3-01-Pren       | No            |
| EPN-15                    | Prenylation motif from RhoF                                               | I3-01 | HIV-1 <sub>NL4-3</sub> p6 <sup>Gag</sup>                                   | p6-I3-01-Pren       | No            |
| EPN-16                    | Prenylation motif from Type II inositol 1,4,5-trisphosphate 5-phosphatase | I3-01 | HIV-1 <sub>NL4-3</sub> p6 <sup>Gag</sup>                                   | p6-I3-01-Pren       | No            |
| EPN-17 (negative control) | PH domain from rat phospholipase C $\delta$                               | I3-01 | -                                                                          | PH-I3-01            | No            |
| EPN-18                    | PH domain from rat phospholipase C $\delta$                               | I3-01 | HIV-1 <sub>NL4-3</sub> p6 <sup>Gag</sup>                                   | PH-I3-01-p6         | Yes $\dagger$ |
| EPN-19                    | PH domain from rat phospholipase C $\delta$                               | I3-01 | HIV-1 <sub>NL4-3</sub> p6 <sup>Gag</sup>                                   | p6-I3-01-pH         | No            |
| EPN-20                    | PH domain from rat phospholipase C $\delta$                               | I3-01 | Ebola VP40 (partial)                                                       | VP40-I3-01-pH       | Yes $\dagger$ |
| EPN-21 (negative control) | PH domain from rat phospholipase C $\delta$                               | I3-01 | Mutated HIV-1 <sub>NL4-3</sub> p6 <sup>Gag</sup> (PTAP <sub>10</sub> AAAA) | p6-I3-01-PH         | No            |
| EPN-22 (negative control) | PH domain from rat phospholipase C $\delta$                               | I3-01 | Mutated HIV-1 <sub>NL4-3</sub> p6 <sup>Gag</sup> (YP <sub>37</sub> AA)     | p6-I3-01-PH         | No            |
| EPN-23                    | PH domain from rat phospholipase C $\delta$                               | I3-01 | HIV-1 <sub>NL4-3</sub> p6 <sup>Gag</sup>                                   | p6-PH-I3-01         | Yes $\dagger$ |
| EPN-24                    | PH domain from rat phospholipase C $\delta$                               | I3-01 | HIV-1 <sub>NL4-3</sub> p6 <sup>Gag</sup>                                   | PH-p6-I3-01         | Yes $\dagger$ |
| EPN-25                    | PH domain from rat phospholipase C $\delta$                               | I3-01 | HIV-1 <sub>NL4-3</sub> p6 <sup>Gag</sup>                                   | I3-01-p6-PH         | Yes $\dagger$ |
| EPN-26                    | PH domain from rat phospholipase C $\delta$                               | I3-01 | HIV-1 <sub>NL4-3</sub> p6 <sup>Gag</sup>                                   | I3-01-PH-p6         | No            |
| EPN-27 (negative control) | C1 domain from PCK $\delta$                                               | I3-01 | -                                                                          | C1-I3-01            | No            |
| EPN-28                    | C1 domain from PCK $\delta$                                               | I3-01 | HIV-1 <sub>NL4-3</sub> p6 <sup>Gag</sup>                                   | C1-I3-01-p6         | No            |
| EPN-29                    | C1 domain from PCK $\delta$                                               | I3-01 | HIV-1 <sub>NL4-3</sub> p6 <sup>Gag</sup>                                   | p6-I3-01-C1         | No            |
| EPN-30 (negative control) | C2 domain from mouse PI3K                                                 | I3-01 | -                                                                          | C2-I3-01            | No            |
| EPN-31                    | C2 domain from mouse PI3K                                                 | I3-01 | HIV-1 <sub>NL4-3</sub> p6 <sup>Gag</sup>                                   | C2-I3-01-p6         | No            |
| EPN-32                    | C2 domain from mouse PI3K                                                 | I3-01 | HIV-1 <sub>NL4-3</sub> p6 <sup>Gag</sup>                                   | p6-I3-01-C2         | No            |
| EPN-33 (negative control) | PX domain from p40phox                                                    | I3-01 | -                                                                          | PX-I3-01            | No            |
| EPN-34                    | PX domain from p40phox                                                    | I3-01 | HIV-1 <sub>NL4-3</sub> p6 <sup>Gag</sup>                                   | PX-I3-01-p6         | No            |
| EPN-35                    | PX domain from p40phox                                                    | I3-01 | HIV-1 <sub>NL4-3</sub> p6 <sup>Gag</sup>                                   | p6-I3-01-PX         | No            |
| EPN-36                    | Myristoylation motif from HIV-1 <sub>NL4-3</sub> Gag                      | I3-01 | VP40 (partial)                                                             | Myr-I3-01-VP40      | Yes $\dagger$ |
| EPN-37                    | Myristoylation motif from HIV-1 <sub>NL4-3</sub> Gag                      | I3-01 | EIAV p9 <sup>Gag</sup>                                                     | Myr-I3-01-p9        | Yes $\dagger$ |
| EPN-38                    | Myristoylation motif from HIV-1 <sub>NL4-3</sub> Gag                      | I3-01 | SV5 M protein (partial)                                                    | Myr-I3-01-M         | Weak          |
| EPN-39                    | Myristoylation motif from HIV-1 <sub>NL4-3</sub> Gag                      | I3-01 | HIV-1 p6 preceded by a 22-residue flexible                                 | Myr-I3-01-linker-p6 | Yes $\dagger$ |

|                           |                                                                                |       | linker                                                           |                       |       |
|---------------------------|--------------------------------------------------------------------------------|-------|------------------------------------------------------------------|-----------------------|-------|
| EPN-40                    | Myristoylation motif from HIV-1 <sub>NL4-3</sub> Gag                           | I3-01 | Ebola VP40 (partial) preceded by a 22-residue flexible linker    | Myr-I3-01-linker-VP40 | No    |
| EPN-41                    | Myristoylation motif from HIV-1 <sub>NL4-3</sub> Gag                           | I3-01 | EIAV p9 preceded by a 22-residue flexible linker                 | Myr-I3-01-linker-p9   | Yes † |
| EPN-42                    | Myristoylation motif from HIV-1 <sub>NL4-3</sub> Gag                           | I3-01 | SV5 M protein (partial) preceded by a 22-residue flexible linker | Myr-I3-01-linker-M    | Weak  |
| EPN-43                    | Myristoylation motif from HIV-1 <sub>NL4-3</sub> Gag                           | I3-01 | Peptide motif PTAPPEY from Ebola VP40                            | Myr-I3-01-PTAPPEY     | Weak  |
| EPN-44                    | Myristoylation motif from HIV-1 <sub>NL4-3</sub> Gag                           | I3-01 | Peptide motif PTAP from HIV-1 p6/Ebola VP40                      | Myr-I3-01-PTAP        | Weak  |
| EPN-45                    | Myristoylation motif from HIV-1 <sub>NL4-3</sub> Gag                           | I3-01 | Peptide motif PPEY from Ebola VP40                               | Myr-I3-01-PPEY        | No    |
| EPN-46                    | Myristoylation motif from HIV-1 <sub>NL4-3</sub> Gag                           | I3-01 | Peptide motif YPLTSL from HIV-1 p6                               | Myr-I3-01-YPLTSL      | Weak  |
| EPN-47                    | Myristoylation motif from HIV-1 <sub>NL4-3</sub> Gag                           | I3-01 | Peptide motif YPDL from EIAV p9 <sup>Gag</sup>                   | Myr-I3-01-YPDL        | Weak  |
| EPN-48                    | Myristoylation motif from HIV-1 <sub>NL4-3</sub> Gag                           | I3-01 | Peptide motif FPIV from SV5 M protein                            | Myr-I3-01-FPIV        | Weak  |
| EPN-49 (negative control) | Mutated myristoylation motif from HIV-1 <sub>NL4-3</sub> Gag(G <sub>2</sub> A) | O3-33 | HIV-1 <sub>NL4-3</sub> p6 <sup>Gag</sup>                         | Myr-O3-33-p6          | No    |
| EPN-50                    | Myristoylation motif from HIV-1 <sub>NL4-3</sub> Gag                           | O3-33 | HIV-1 <sub>NL4-3</sub> p6 <sup>Gag</sup>                         | Myr-O3-33-p6          | No    |
| EPN-51                    | PH domain from rat phospholipase Cδ                                            | O3-33 | HIV-1 <sub>NL4-3</sub> p6 <sup>Gag</sup>                         | p6-O3-33-PH           | Yes † |

Note: Of the 20 constructs that failed to produce EPNs, the following 11 carried membrane-binding domains that failed in all constructs tested: Five constructs that included four different CaaX boxes as membrane-binding elements (EPNs 12-16) and pairs of constructs that each carried C1 domains (EPNs 28 and 29), C2 domains (EPNs 31 and 32), or PX domains (EPNs 34 and 35). The consistent failure of constructs that carried these membrane-binding elements suggests either that these proteins did not interact with membranes at all, or that they were targeted to internal membranes that did not lead to productive release of extracellular EPNs.

\* Architecture refers to the order in the protein primary structure of the three functional elements required for EPN release. For clarity, linkers and epitope tags (i.e., Myc) are not shown.

\*\* Protease and aldolase assays (for I3-01 based constructs) indicate release within membrane-enclosed vesicles

† Results shown in Extended Data Fig. 8

‡ Taken from ref. 1

### Supplementary Table 2 | Amino acid sequences of the 43 EPN constructs and 8 negative control constructs surveyed.

| Construct | Amino acid sequence                                                                                                                                                                                                                                                                                                |
|-----------|--------------------------------------------------------------------------------------------------------------------------------------------------------------------------------------------------------------------------------------------------------------------------------------------------------------------|
| EPN-01    | MGARASGSKSGSGSDSGSKIEELFKKHKIVAVLRANSVEEAKKKALAVFL<br>GGVHLIEITFTVPDADTVIKELSFLEKMGAIIGAGTIVTSVEQCRKAVESG<br>AEFIVSPHLDEEISQFCKEKGVFYMPGVMTPELVKAMKLGHTIILKLFPG<br>EVLGPPQFVKAMKGFPPNVKVFVPTGGVNLNDVCEWFKAGVLAVGVGSALVK<br>GTPVEVAEKAKAFVEKIRGCTEQKLISEEDLQSRPEPTAPPEESFRSGVE<br>TTTTPPQKQEPIDKELYPLTSLRSLFGNDPSSQ |
| EPN-02    | MAARASGSKSGSGSDSGSKIEELFKKHKIVAVLRANSVEEAKKKALAVFL                                                                                                                                                                                                                                                                 |

|                    |                                                                                                                                                                                                                                                                                                                           |
|--------------------|---------------------------------------------------------------------------------------------------------------------------------------------------------------------------------------------------------------------------------------------------------------------------------------------------------------------------|
| (negative control) | GGVHLIEITFTVPDADTVIKELSFLKEMGAIIGAGTVTSVEQCRKAVESG<br>AEFIVSPHLDEEISQFCKEKGVFYMPGVMTPTTELVKAMKLGHTILKLFPG<br>EVLVGPQFVKAMKGFPPNVKVFVPTGGVNLNDNVCEWFKAGVLAVGVGSALVK<br>GTPVEVAEKAKAFVEKIRGCTEQKLISEEDLQSRPEPTAPPEESFRSGVE<br>TTTTPPQKQEPIDKELYPLTSLRSLFGNDPSSQ                                                             |
| EPN-03             | MGAQFSGSKSGSGSDSGSKIEELFKKHKIVAVLRANSVEEAKKKALAVFL<br>GGVHLIEITFTVPDADTVIKELSFLKEMGAIIGAGTVTSVEQCRKAVESG<br>AEFIVSPHLDEEISQFCKEKGVFYMPGVMTPTTELVKAMKLGHTILKLFPG<br>EVLVGPQFVKAMKGFPPNVKVFVPTGGVNLNDNVCEWFKAGVLAVGVGSALVK<br>GTPVEVAEKAKAFVEKIRGCTEQKLISEEDLQSRPEPTAPPEESFRSGVE<br>TTTTPPQKQEPIDKELYPLTSLRSLFGNDPSSQ       |
| EPN-04             | MGSSKSGSKSGSGSDSGSKIEELFKKHKIVAVLRANSVEEAKKKALAVFL<br>GGVHLIEITFTVPDADTVIKELSFLKEMGAIIGAGTVTSVEQCRKAVESG<br>AEFIVSPHLDEEISQFCKEKGVFYMPGVMTPTTELVKAMKLGHTILKLFPG<br>EVLVGPQFVKAMKGFPPNVKVFVPTGGVNLNDNVCEWFKAGVLAVGVGSALVK<br>GTPVEVAEKAKAFVEKIRGCTEQKLISEEDLQSRPEPTAPPEESFRSGVE<br>TTTTPPQKQEPIDKELYPLTSLRSLFGNDPSSQ       |
| EPN-05             | MGKQNSGSKSGSGSDSGSKIEELFKKHKIVAVLRANSVEEAKKKALAVFL<br>GGVHLIEITFTVPDADTVIKELSFLKEMGAIIGAGTVTSVEQCRKAVESG<br>AEFIVSPHLDEEISQFCKEKGVFYMPGVMTPTTELVKAMKLGHTILKLFPG<br>EVLVGPQFVKAMKGFPPNVKVFVPTGGVNLNDNVCEWFKAGVLAVGVGSALVK<br>GTPVEVAEKAKAFVEKIRGCTEQKLISEEDLQSRPEPTAPPEESFRSGVE<br>TTTTPPQKQEPIDKELYPLTSLRSLFGNDPSSQ       |
| EPN-06             | MGARASLQSRPEPTAPPEESFRSGVETTTTPPQKQEPIDKELYPLTSLRSL<br>FGNDPSSQKIEELFKKHKIVAVLRANSVEEAKKKALAVFLGGVHLIEITF<br>TVPDADTVIKELSFLKEMGAIIGAGTVTSVEQCRKAVESGAEFIVSPHL<br>DEEISQFCKEKGVFYMPGVMTPTTELVKAMKLGHTILKLFPGEVVGPQFVKA<br>MKGPPNVKVFVPTGGVNLNDNVCEWFKAGVLAVGVGSALVKGTPEVAEKA<br>KAFVEKIRGCTEQKLISEEDL                     |
| EPN-07             | MGCIKSRKRDNLNGSKSGSGSDSGSKIEELFKKHKIVAVLRANSVEEAKK<br>KALAVFLGGVHLIEITFTVPDADTVIKELSFLKEMGAIIGAGTVTSVEQC<br>RKAVESGAEFIVSPHLDEEISQFCKEKGVFYMPGVMTPTTELVKAMKLGHT<br>ILKLFPGEVVGPQFVKAMKGFPPNVKVFVPTGGVNLNDNVCEWFKAGVLAVG<br>VGSALVKGTPEVAEKAKAFVEKIRGCTEQKLISEEDLQSRPEPTAPPEE<br>SFRSGVETTTTPPQKQEPIDKELYPLTSLRSLFGNDPSSQ  |
| EPN-08             | MGCTLSAEERAALGSKSGSGSDSGSKIEELFKKHKIVAVLRANSVEEAKK<br>KALAVFLGGVHLIEITFTVPDADTVIKELSFLKEMGAIIGAGTVTSVEQC<br>RKAVESGAEFIVSPHLDEEISQFCKEKGVFYMPGVMTPTTELVKAMKLGHT<br>ILKLFPGEVVGPQFVKAMKGFPPNVKVFVPTGGVNLNDNVCEWFKAGVLAVG<br>VGSALVKGTPEVAEKAKAFVEKIRGCTEQKLISEEDLQSRPEPTAPPEE<br>SFRSGVETTTTPPQKQEPIDKELYPLTSLRSLFGNDPSSQ  |
| EPN-09             | MLCCMRRTKQVEKSGSKSGSGSDSGSKIEELFKKHKIVAVLRANSVEEAKK<br>KALAVFLGGVHLIEITFTVPDADTVIKELSFLKEMGAIIGAGTVTSVEQC<br>RKAVESGAEFIVSPHLDEEISQFCKEKGVFYMPGVMTPTTELVKAMKLGHT<br>ILKLFPGEVVGPQFVKAMKGFPPNVKVFVPTGGVNLNDNVCEWFKAGVLAVG<br>VGSALVKGTPEVAEKAKAFVEKIRGCTEQKLISEEDLQSRPEPTAPPEE<br>SFRSGVETTTTPPQKQEPIDKELYPLTSLRSLFGNDPSSQ |
| EPN-10             | MDCLCIVTTKRYRSGSKSGSGSDSGSKIEELFKKHKIVAVLRANSVEEAKK<br>KALAVFLGGVHLIEITFTVPDADTVIKELSFLKEMGAIIGAGTVTSVEQC<br>RKAVESGAEFIVSPHLDEEISQFCKEKGVFYMPGVMTPTTELVKAMKLGHT<br>ILKLFPGEVVGPQFVKAMKGFPPNVKVFVPTGGVNLNDNVCEWFKAGVLAVG<br>VGSALVKGTPEVAEKAKAFVEKIRGCTEQKLISEEDLQSRPEPTAPPEE<br>SFRSGVETTTTPPQKQEPIDKELYPLTSLRSLFGNDPSSQ |
| EPN-11             | MGCIKSRKRDNLNLQSRPEPTAPPEESFRSGVETTTTPPQKQEPIDKELYP<br>LTSLRSLFGNDPSSQKIEELFKKHKIVAVLRANSVEEAKKKALAVFLGGV<br>HLIEITFTVPDADTVIKELSFLKEMGAIIGAGTVTSVEQCRKAVESGAEF<br>IVSPHLDEEISQFCKEKGVFYMPGVMTPTTELVKAMKLGHTILKLFPGEVV<br>GPQFVKAMKGFPPNVKVFVPTGGVNLNDNVCEWFKAGVLAVGVGSALVKGT<br>PEVAEKAKAFVEKIRGCTEQKLISEEDL             |
| EPN-12             | MKIEELFKKHKIVAVLRANSVEEAKKKALAVFLGGVHLIEITFTVPDADT<br>VIKELSFLKEMGAIIGAGTVTSVEQCRKAVESGAEFIVSPHLDEEISQFC<br>KEKGVFYMPGVMTPTTELVKAMKLGHTILKLFPGEVVGPQFVKAMKGFPPN                                                                                                                                                           |

|                           |                                                                                                                                                                                                                                                                                                                                                                                                                                                |
|---------------------------|------------------------------------------------------------------------------------------------------------------------------------------------------------------------------------------------------------------------------------------------------------------------------------------------------------------------------------------------------------------------------------------------------------------------------------------------|
|                           | VKQVPTGGVNLNDVCEWFKAGVLA VGVGSALVKGT PVEVAEKAKAFVEKI<br>RGCTEQKLI SEEDLQSRPEPTAPPEESFRSGVETTTTPQKQEPIDKELYPLTSLRSLFGNDP<br>LTSLSLFGNDPSSQKKKKKSKTKCVIM                                                                                                                                                                                                                                                                                         |
| EPN-13                    | MLQSRPEPTAPPEESFRSGVETTTTPQKQEPIDKELYPLTSLRSLFGNDP<br>SSQKIEELFKKKHKIVAVLRANSVVEEAKKALAVFLGGVHLIEITFTVPDA<br>DTVIKELSFLKEMGAIIGAGTVTSVEQCRKAVESGAEFIVSPHLDEEISQ<br>FCKEKGVFYMPGVMTPELVKAMKLGHTILKLFPGEVVGPQFVKAMKGP<br>PNVKFVPTGGVNLNDVCEWFKAGVLA VGVGSALVKGT PVEVAEKAKAFVE<br>KIRGCTEQKLI SEEDLGS GSGDGGGRSGRGGDGS GSSGSKKKKSKTKCVI<br>M                                                                                                      |
| EPN-14                    | MLQSRPEPTAPPEESFRSGVETTTTPQKQEPIDKELYPLTSLRSLFGNDP<br>SSQKIEELFKKKHKIVAVLRANSVVEEAKKALAVFLGGVHLIEITFTVPDA<br>DTVIKELSFLKEMGAIIGAGTVTSVEQCRKAVESGAEFIVSPHLDEEISQ<br>FCKEKGVFYMPGVMTPELVKAMKLGHTILKLFPGEVVGPQFVKAMKGP<br>PNVKFVPTGGVNLNDVCEWFKAGVLA VGVGSALVKGT PVEVAEKAKAFVE<br>KIRGCTEQKLI SEEDLGS GSGDGGGRSGRGGDGS GSSGSKKKKSKTKCVI<br>M                                                                                                      |
| EPN-15                    | MLQSRPEPTAPPEESFRSGVETTTTPQKQEPIDKELYPLTSLRSLFGNDP<br>SSQKIEELFKKKHKIVAVLRANSVVEEAKKALAVFLGGVHLIEITFTVPDA<br>DTVIKELSFLKEMGAIIGAGTVTSVEQCRKAVESGAEFIVSPHLDEEISQ<br>FCKEKGVFYMPGVMTPELVKAMKLGHTILKLFPGEVVGPQFVKAMKGP<br>PNVKFVPTGGVNLNDVCEWFKAGVLA VGVGSALVKGT PVEVAEKAKAFVE<br>KIRGCTEQKLI SEEDLGS GSGDGGGRSGRGGDGS GSSGAQRQKRRLL<br>L                                                                                                         |
| EPN-16                    | MLQSRPEPTAPPEESFRSGVETTTTPQKQEPIDKELYPLTSLRSLFGNDP<br>SSQKIEELFKKKHKIVAVLRANSVVEEAKKALAVFLGGVHLIEITFTVPDA<br>DTVIKELSFLKEMGAIIGAGTVTSVEQCRKAVESGAEFIVSPHLDEEISQ<br>FCKEKGVFYMPGVMTPELVKAMKLGHTILKLFPGEVVGPQFVKAMKGP<br>PNVKFVPTGGVNLNDVCEWFKAGVLA VGVGSALVKGT PVEVAEKAKAFVE<br>KIRGCTEQKLI SEEDLGS GSGDGGGRSGRGGDGS GSSGAQEFIHQFLCNP<br>L                                                                                                      |
| EPN-17 (negative control) | MHGLQDDPDLQALLKGSQLLKVKSSSWRRERFYKQEDCKTIWQESRKVM<br>RSPESQLFSIEDIQEVRMGHRTEGLEKFARDIPEDRCFSIVFKDQRNTLD<br>LIAPSPADAQHWVQGLRKI IHHSGSMDQRQKSGSKIEELFKKKHKIVAVL<br>RANSVVEEAKKALAVFLGGVHLIEITFTVPDADTVIKELSFLKEMGAIIG<br>AGTVTSVEQCRKAVESGAEFIVSPHLDEEISQFCKEKGVFYMPGVMTPE<br>LVKAMKLGHTILKLFPGEVVGPQFVKAMKGPFPNVKFPVPTGGVNLNDVCE<br>WFKAGVLA VGVGSALVKGT PVEVAEKAKAFVEKIRGCTEQKLI SEEDL                                                        |
| EPN-18                    | MHGLQDDPDLQALLKGSQLLKVKSSSWRRERFYKQEDCKTIWQESRKVM<br>RSPESQLFSIEDIQEVRMGHRTEGLEKFARDIPEDRCFSIVFKDQRNTLD<br>LIAPSPADAQHWVQGLRKI IHHSGSMDQRQKSGSKIEELFKKKHKIVAVL<br>RANSVVEEAKKALAVFLGGVHLIEITFTVPDADTVIKELSFLKEMGAIIG<br>AGTVTSVEQCRKAVESGAEFIVSPHLDEEISQFCKEKGVFYMPGVMTPE<br>LVKAMKLGHTILKLFPGEVVGPQFVKAMKGPFPNVKFPVPTGGVNLNDVCE<br>WFKAGVLA VGVGSALVKGT PVEVAEKAKAFVEKIRGCTEQKLI SEEDLQ<br>SRPEPTAPPEESFRSGVETTTTPQKQEPIDKELYPLTSLRSLFGNDPSSQ |
| EPN-19                    | MLQSRPEPTAPPEESFRSGVETTTTPQKQEPIDKELYPLTSLRSLFGNDP<br>SSQKIEELFKKKHKIVAVLRANSVVEEAKKALAVFLGGVHLIEITFTVPDA<br>DTVIKELSFLKEMGAIIGAGTVTSVEQCRKAVESGAEFIVSPHLDEEISQ<br>FCKEKGVFYMPGVMTPELVKAMKLGHTILKLFPGEVVGPQFVKAMKGP<br>PNVKFVPTGGVNLNDVCEWFKAGVLA VGVGSALVKGT PVEVAEKAKAFVE<br>KIRGCTEQKLI SEEDLHGLQDDPDLQALLKGSQLLKVKSSSWRRERFYK<br>QEDCKTIWQESRKVMRSPESQLFSIEDIQEVRMGHRTEGLEKFARDIPED<br>RCFSIVFKDQRNTLDLIAPSPADAQHWVQGLRKI IHHSGSMDQRQK     |
| EPN-20                    | MRRVILPTAPPEYMEATYPVRGSGSKIEELFKKKHKIVAVLRANSVVEEAK<br>KALAVFLGGVHLIEITFTVPDADTVIKELSFLKEMGAIIGAGTVTSVEQC<br>RKAVESGAEFIVSPHLDEEISQFCKEKGVFYMPGVMTPELVKAMKLGHT<br>ILKLFPGEVVGPQFVKAMKGPFPNVKFPVPTGGVNLNDVCEWFKAGVLA V<br>VGSALVKGT PVEVAEKAKAFVEKIRGCTEQKLI SEEDLHGLQDDPDLQAL<br>LKGSQLLKVKSSSWRRERFYKQEDCKTIWQESRKVMRSPESQLFSIEDI<br>QEVRMGHRTEGLEKFARDIPEDRCFSIVFKDQRNTLDLIAPSPADAQHWV<br>QGLRKI IHHSGSMDQRQK                                |

|                           |                                                                                                                                                                                                                                                                                                                                                                                                                                                                                                 |
|---------------------------|-------------------------------------------------------------------------------------------------------------------------------------------------------------------------------------------------------------------------------------------------------------------------------------------------------------------------------------------------------------------------------------------------------------------------------------------------------------------------------------------------|
| EPN-21 (negative control) | MLQSRPEAAAPEESFRSGVETTTTPQKQEPIDKELYPLTSLRSLFGNDP<br>SSQKIEELFKKHKIIVAVLRANSVEEAKKALAVFLGGVHLIEITFTVPDA<br>DTVIKELSFLKEMGAIIGAGTVTSVEQCRKAVESGAEFIVSPHLDEEISQ<br>FCKEKGVFYMPGVMTPTLVKAMKLGHTILKLFPGEVVGPQFVKAMKGGPF<br>PNVKFVPTGGVNLDNVCEWFKAGVLAVGVGSALVKGTPVEVAEKAKAFVE<br>KIRGCTEQKLISEEDLHGLQDDPDLQALLKGSQLLKVKSSSWRRERFYKL<br>QEDCKTIWQESRKVMRSPESQLFSIEDIQEVRMGHRTEGLEKFARDI PED<br>RCFSIVFKDQRNTLDLIAPSPADAQHWVQGLRKKIHHSGSMDQRQK                                                        |
| EPN-22 (negative control) | MLQSRPEPTAPPEESFRSGVETTTTPQKQEPIDKELAAALTSRSLFGNDP<br>SSQKIEELFKKHKIIVAVLRANSVEEAKKALAVFLGGVHLIEITFTVPDA<br>DTVIKELSFLKEMGAIIGAGTVTSVEQCRKAVESGAEFIVSPHLDEEISQ<br>FCKEKGVFYMPGVMTPTLVKAMKLGHTILKLFPGEVVGPQFVKAMKGGPF<br>PNVKFVPTGGVNLDNVCEWFKAGVLAVGVGSALVKGTPVEVAEKAKAFVE<br>KIRGCTEQKLISEEDLHGLQDDPDLQALLKGSQLLKVKSSSWRRERFYKL<br>QEDCKTIWQESRKVMRSPESQLFSIEDIQEVRMGHRTEGLEKFARDI PED<br>RCFSIVFKDQRNTLDLIAPSPADAQHWVQGLRKKIHHSGSMDQRQK                                                       |
| EPN-23                    | MLQSRPEPTAPPEESFRSGVETTTTPQKQEPIDKELYPLTSLRSLFGNDP<br>SSQHLGLQDDPDLQALLKGSQLLKVKSSSWRRERFYKLQEDCKTIWQESRK<br>VMRSPESQLFSIEDIQEVRMGHRTEGLEKFARDI PEDRCFSIVFKDQRNT<br>LDLIAPSPADAQHWVQGLRKKIHHSGSMDQRQKSGSKIEELFKKHKIIV<br>VLRANSVEEAKKALAVFLGGVHLIEITFTVPDADTVIKELSFLKEMGAI<br>IGAGTVTSVEQCRKAVESGAEFIVSPHLDEEISQFCKEKGVFYMPGVMT<br>PTLVKAMKLGHTILKLFPGEVVGPQFVKAMKGGPFNVKFPVPTGGVNLDNV<br>CEWFKAGVLAVGVGSALVKGTPVEVAEKAKAFVEKIRGCTEQKLISEEDL                                                    |
| EPN-24                    | MHGLQDDPDLQALLKGSQLLKVKSSSWRRERFYKLQEDCKTIWQESRKVM<br>RSPESQLFSIEDIQEVRMGHRTEGLEKFARDI PEDRCFSIVFKDQRNTLD<br>LIAPSPADAQHWVQGLRKKIHHSGSMDQRQKLSRPEPTAPPEESFRSGV<br>ETTTTPQKQEPIDKELYPLTSLRSLFGNDPSSQKIEELFKKHKIIVAVLR<br>ANSVEEAKKALAVFLGGVHLIEITFTVPDADTVIKELSFLKEMGAIIGAG<br>TVTSVEQCRKAVESGAEFIVSPHLDEEISQFCKEKGVFYMPGVMTPTLV<br>KAMKLGHTILKLFPGEVVGPQFVKAMKGGPFNVKFPVPTGGVNLDNVCEW<br>FKAGVLAVGVGSALVKGTPVEVAEKAKAFVEKIRGCTEQKLISEEDL                                                        |
| EPN-25                    | MKIEELFKKHKIIVAVLRANSVEEAKKALAVFLGGVHLIEITFTVPDADT<br>VIKELSFLKEMGAIIGAGTVTSVEQCRKAVESGAEFIVSPHLDEEISQFC<br>KEKGVFYMPGVMTPTLVKAMKLGHTILKLFPGEVVGPQFVKAMKGGPFN<br>VKFVPTGGVNLDNVCEWFKAGVLAVGVGSALVKGTPVEVAEKAKAFVEKI<br>RGCTEQKLISEEDLQSRPEPTAPPEESFRSGVETTTTPQKQEPIDKELY<br>PLTSLRSLFGNDPSSQHLGLQDDPDLQALLKGSQLLKVKSSSWRRERFYKL<br>QEDCKTIWQESRKVMRSPESQLFSIEDIQEVRMGHRTEGLEKFARDI PED<br>RCFSIVFKDQRNTLDLIAPSPADAQHWVQGLRKKIHHSGSMDQRQK                                                        |
| EPN-26                    | MKIEELFKKHKIIVAVLRANSVEEAKKALAVFLGGVHLIEITFTVPDADT<br>VIKELSFLKEMGAIIGAGTVTSVEQCRKAVESGAEFIVSPHLDEEISQFC<br>KEKGVFYMPGVMTPTLVKAMKLGHTILKLFPGEVVGPQFVKAMKGGPFN<br>VKFVPTGGVNLDNVCEWFKAGVLAVGVGSALVKGTPVEVAEKAKAFVEKI<br>RGCTEQKLISEEDLQSRPEPTAPPEESFRSGVETTTTPQKQEPIDKELY<br>PLTSLRSLFGNDPSSQHLGLQDDPDLQALLKGSQLLKVKSSSWRRERFYKL<br>QEDCKTIWQESRKVMRSPESQLFSIEDIQEVRMGHRTEGLEKFARDI PED<br>RCFSIVFKDQRNTLDLIAPSPADAQHWVQGLRKKIHHSGSMDQRQKLSR<br>PEPTAPPEESFRSGVETTTTPQKQEPIDKELYPLTSLRSLFGNDPSSQ |
| EPN-27 (negative control) | MPHRFKVHNYSPTFCDHCGSLLWGLVKQGLKCEDCGMNVHKKCREKVAN<br>LCCGSDGSGRSGSKIEELFKKHKIIVAVLRANSVEEAKKALAVFLGGVHL<br>IEITFTVPDADTVIKELSFLKEMGAIIGAGTVTSVEQCRKAVESGAEFIV<br>SPHLDEEISQFCKEKGVFYMPGVMTPTLVKAMKLGHTILKLFPGEVVGP<br>QFVKAMKGGPFNVKFPVPTGGVNLDNVCEWFKAGVLAVGVGSALVKGTPVE<br>VAEKAKAFVEKIRGCTEQKLISEEDL                                                                                                                                                                                         |
| EPN-28                    | MPHRFKVHNYSPTFCDHCGSLLWGLVKQGLKCEDCGMNVHKKCREKVAN<br>LCCGSDGSGRSGSKIEELFKKHKIIVAVLRANSVEEAKKALAVFLGGVHL<br>IEITFTVPDADTVIKELSFLKEMGAIIGAGTVTSVEQCRKAVESGAEFIV<br>SPHLDEEISQFCKEKGVFYMPGVMTPTLVKAMKLGHTILKLFPGEVVGP<br>QFVKAMKGGPFNVKFPVPTGGVNLDNVCEWFKAGVLAVGVGSALVKGTPVE<br>VAEKAKAFVEKIRGCTEQKLISEEDLQSRPEPTAPPEESFRSGVETTTTP<br>PQKQEPIDKELYPLTSLRSLFGNDPSSQ                                                                                                                                 |
| EPN-29                    | MLQSRPEPTAPPEESFRSGVETTTTPQKQEPIDKELYPLTSLRSLFGNDP                                                                                                                                                                                                                                                                                                                                                                                                                                              |

|                           |                                                                                                                                                                                                                                                                                                                                                                                                                                                                             |
|---------------------------|-----------------------------------------------------------------------------------------------------------------------------------------------------------------------------------------------------------------------------------------------------------------------------------------------------------------------------------------------------------------------------------------------------------------------------------------------------------------------------|
|                           | SSQKIEELFKKHKIVAVLRANSVEEAKKKALAVFLGGVHLIEITFTVPDA<br>DTVIKELSFLEKEMGAIIGAGTVTSVEQCRKAVESGAEFIVSPHLDEEISQ<br>FCKEKGVFYMFGVMTPTTELVKAMKLGHTILKLFPGEVVGPQFVKAMKGGP<br>PNVKFVPTGGVNLNDVCEWFKAGVLAVGVGSALVKGTPEVEAEKAKAFVE<br>KIRGCTEQKLISEEDLGS DSGSRSGSPHRFKVHNYMSPTEFCDHCGSLLWG<br>LVKQGLKCEDCGMNVHKKCREKVANLCG                                                                                                                                                              |
| EPN-30 (negative control) | MGAVKLSVSYRNGTLFIMVMHIKDLVTEGDADPNPYVKTYLLPDTHKTSK<br>RKTISRKTRNPTFNEMLVYSGYSKETLRQRELQLSVLSAESLRENFFLG<br>GITLPLKDFNLSKETVKWYQLTAATYLGSGSGDGGGRSGRGGDGS GSSGK<br>IEELFKKHKIVAVLRANSVEEAKKKALAVFLGGVHLIEITFTVPDADTVI<br>KELSFLEKEMGAIIGAGTVTSVEQCRKAVESGAEFIVSPHLDEEISQFCKE<br>KGVFYMFGVMTPTTELVKAMKLGHTILKLFPGEVVGPQFVKAMKGGP<br>FVPTGGVNLNDVCEWFKAGVLAVGVGSALVKGTPEVEAEKAKAFVEKIRG<br>CTEQKLISEEDL                                                                        |
| EPN-31                    | MGAVKLSVSYRNGTLFIMVMHIKDLVTEGDADPNPYVKTYLLPDTHKTSK<br>RKTISRKTRNPTFNEMLVYSGYSKETLRQRELQLSVLSAESLRENFFLG<br>GITLPLKDFNLSKETVKWYQLTAATYLGSGSGDGGGRSGRGGDGS GSSGK<br>IEELFKKHKIVAVLRANSVEEAKKKALAVFLGGVHLIEITFTVPDADTVI<br>KELSFLEKEMGAIIGAGTVTSVEQCRKAVESGAEFIVSPHLDEEISQFCKE<br>KGVFYMFGVMTPTTELVKAMKLGHTILKLFPGEVVGPQFVKAMKGGP<br>FVPTGGVNLNDVCEWFKAGVLAVGVGSALVKGTPEVEAEKAKAFVEKIRG<br>CTEQKLISEEDLQSRPEPTAPPEESFRSGVETTTTPQKQEPIDKELYPLT<br>SLRSLFGNDPSSQ                 |
| EPN-32                    | MLQSRPEPTAPPEESFRSGVETTTTPQKQEPIDKELYPLTSLRSLFGNDP<br>SSQKIEELFKKHKIVAVLRANSVEEAKKKALAVFLGGVHLIEITFTVPDA<br>DTVIKELSFLEKEMGAIIGAGTVTSVEQCRKAVESGAEFIVSPHLDEEISQ<br>FCKEKGVFYMFGVMTPTTELVKAMKLGHTILKLFPGEVVGPQFVKAMKGGP<br>KIRGCTEQKLISEEDLGS DSGSGDGGGRSGRGGDGS GSSGKSVSYRNG<br>TLFIMVMHIKDLVTEGDADPNPYVKTYLLPDTHKTSKRKTISRKTRNPT<br>FNEMLVYSGYSKETLRQRELQLSVLSAESLRENFFLGGITLPLKDFNLSK<br>ETVKWYQLTAATYL                                                                   |
| EPN-33 (negative control) | MAVAQQLRAESDFEQLPDDVAISANIADIEEKRGFTSHFVIEVKTKGG<br>SKYLIYRRYRQFHALQSKLEERFGPDSKSSALACTLPTLPAKVYVGVKQE<br>IAEMRIPALNAYMKSLLSLPVWVLMDEDVRIFFYQSPYDSEQVPQALRRG<br>SDGSGRSGSKIEELFKKHKIVAVLRANSVEEAKKKALAVFLGGVHLIEIT<br>FTVPDADTVIKELSFLEKEMGAIIGAGTVTSVEQCRKAVESGAEFIVSPHL<br>DEEISQFCKEKGVFYMFGVMTPTTELVKAMKLGHTILKLFPGEVVGPQFVK<br>AMKGGP<br>PNVKFVPTGGVNLNDVCEWFKAGVLAVGVGSALVKGTPEVEAEK<br>AKAFVEKIRGCTEQKLISEEDL                                                        |
| EPN-34                    | MAVAQQLRAESDFEQLPDDVAISANIADIEEKRGFTSHFVIEVKTKGG<br>SKYLIYRRYRQFHALQSKLEERFGPDSKSSALACTLPTLPAKVYVGVKQE<br>IAEMRIPALNAYMKSLLSLPVWVLMDEDVRIFFYQSPYDSEQVPQALRRG<br>SDGSGRSGSKIEELFKKHKIVAVLRANSVEEAKKKALAVFLGGVHLIEIT<br>FTVPDADTVIKELSFLEKEMGAIIGAGTVTSVEQCRKAVESGAEFIVSPHL<br>DEEISQFCKEKGVFYMFGVMTPTTELVKAMKLGHTILKLFPGEVVGPQFVK<br>AMKGGP<br>PNVKFVPTGGVNLNDVCEWFKAGVLAVGVGSALVKGTPEVEAEK<br>AKAFVEKIRGCTEQKLISEEDLQSRPEPTAPPEESFRSGVETTTTPQKQE<br>PIDKELYPLTSLRSLFGNDPSSQ |
| EPN-35                    | MLQSRPEPTAPPEESFRSGVETTTTPQKQEPIDKELYPLTSLRSLFGNDP<br>SSQKIEELFKKHKIVAVLRANSVEEAKKKALAVFLGGVHLIEITFTVPDA<br>DTVIKELSFLEKEMGAIIGAGTVTSVEQCRKAVESGAEFIVSPHLDEEISQ<br>FCKEKGVFYMFGVMTPTTELVKAMKLGHTILKLFPGEVVGPQFVKAMKGGP<br>PNVKFVPTGGVNLNDVCEWFKAGVLAVGVGSALVKGTPEVEAEKAKAFVE<br>KIRGCTEQKLISEEDLGS SAVAQQLRAESDFEQLPDDVAISANIADIEE<br>KRGFTSHFVIEVKTKGGSKYLIYRRYRQFHALQSKLEERFGPDSKSSA<br>LACTLPTLPAKVYVGVKQEI<br>IAEMRIPALNAYMKSLLSLPVWVLMDEDVRI<br>FFYQSPYDSEQVPQALRR     |
| EPN-36                    | MGARASGSKSGSDSGSKIEELFKKHKIVAVLRANSVEEAKKKALAVFL<br>GGVHLIEITFTVPDADTVIKELSFLEKEMGAIIGAGTVTSVEQCRKAVESG<br>AEFIVSPHLDEEISQFCKEKGVFYMFGVMTPTTELVKAMKLGHTILKLFPG<br>EVVGPQFVKAMKGGP<br>PNVKFVPTGGVNLNDVCEWFKAGVLAVGVGSALVK<br>GTPPEVEAEKAKAFVEKIRGCTEQKLISEEDLRRVILPTAPPEYMEAIYPV                                                                                                                                                                                             |



|        |                                                                                                                                                                                                                                                                                                                                                   |
|--------|---------------------------------------------------------------------------------------------------------------------------------------------------------------------------------------------------------------------------------------------------------------------------------------------------------------------------------------------------|
|        | R                                                                                                                                                                                                                                                                                                                                                 |
| EPN-37 | MGARASGSKSGSGSDSGSKIEELFKKHKIVAVLRANSVEEAKKKALAVFL<br>GGVHLIEITFTVPDADTVIKELSFLKEMGAIIGAGTIVTSVEQCRKAVESG<br>AEFIVSPHLDEEISQFCKEKGVFYMPGVMTPTTELVKAMKLGHTILKLFPG<br>EVLGPPQFVKAMKGFPPNVKVFVPTGGVNLNDNVCEWFKAGVLAVGVGSALVK<br>GTPVEVAEKAKAFVEKIRGCTEQKLISEEDLPQQKSQHNKSVVQETPQT<br>QNLYPDLSSEIKKEYNVKEKDQVEDLNLDLWE                                |
| EPN-38 | MGARASGSKSGSGSDSGSKIEELFKKHKIVAVLRANSVEEAKKKALAVFL<br>GGVHLIEITFTVPDADTVIKELSFLKEMGAIIGAGTIVTSVEQCRKAVESG<br>AEFIVSPHLDEEISQFCKEKGVFYMPGVMTPTTELVKAMKLGHTILKLFPG<br>EVLGPPQFVKAMKGFPPNVKVFVPTGGVNLNDNVCEWFKAGVLAVGVGSALVK<br>GTPVEVAEKAKAFVEKIRGCTEQKLISEEDLNPRQSIKAFPIVINS DGGE<br>K                                                             |
| EPN-39 | MGARASGSKSGSGSDSGSKIEELFKKHKIVAVLRANSVEEAKKKALAVFL<br>GGVHLIEITFTVPDADTVIKELSFLKEMGAIIGAGTIVTSVEQCRKAVESG<br>AEFIVSPHLDEEISQFCKEKGVFYMPGVMTPTTELVKAMKLGHTILKLFPG<br>EVLGPPQFVKAMKGFPPNVKVFVPTGGVNLNDNVCEWFKAGVLAVGVGSALVK<br>GTPVEVAEKAKAFVEKIRGCTEQKLISEEDLGS GSGDGGGRGSRGGDGS GG<br>SSGLQSRPEPTAPPEESFRSGVETTPPQKQEPIDKELYPLTSLRSLFGN<br>DPSSQ  |
| EPN-40 | MGARASGSKSGSGSDSGSKIEELFKKHKIVAVLRANSVEEAKKKALAVFL<br>GGVHLIEITFTVPDADTVIKELSFLKEMGAIIGAGTIVTSVEQCRKAVESG<br>AEFIVSPHLDEEISQFCKEKGVFYMPGVMTPTTELVKAMKLGHTILKLFPG<br>EVLGPPQFVKAMKGFPPNVKVFVPTGGVNLNDNVCEWFKAGVLAVGVGSALVK<br>GTPVEVAEKAKAFVEKIRGCTEQKLISEEDLGS GSGDGGGRGSRGGDGS GG<br>SSGRRVILPTAPPEYMEAIYPVR                                     |
| EPN-41 | MGARASGSKSGSGSDSGSKIEELFKKHKIVAVLRANSVEEAKKKALAVFL<br>GGVHLIEITFTVPDADTVIKELSFLKEMGAIIGAGTIVTSVEQCRKAVESG<br>AEFIVSPHLDEEISQFCKEKGVFYMPGVMTPTTELVKAMKLGHTILKLFPG<br>EVLGPPQFVKAMKGFPPNVKVFVPTGGVNLNDNVCEWFKAGVLAVGVGSALVK<br>GTPVEVAEKAKAFVEKIRGCTEQKLISEEDLGS GSGDGGGRGSRGGDGS GG<br>SSGPIQQKSQHNKSVVQETPQTQNLYPDLSSEIKKEYNVKEKDQVEDLNLD<br>SLWE |
| EPN-42 | MGARASGSKSGSGSDSGSKIEELFKKHKIVAVLRANSVEEAKKKALAVFL<br>GGVHLIEITFTVPDADTVIKELSFLKEMGAIIGAGTIVTSVEQCRKAVESG<br>AEFIVSPHLDEEISQFCKEKGVFYMPGVMTPTTELVKAMKLGHTILKLFPG<br>EVLGPPQFVKAMKGFPPNVKVFVPTGGVNLNDNVCEWFKAGVLAVGVGSALVK<br>GTPVEVAEKAKAFVEKIRGCTEQKLISEEDLGS GSGDGGGRGSRGGDGS GG<br>SSGNPRQSIKAFPIVINS DGGEK                                    |
| EPN-43 | MGARASGSKSGSGSDSGSKIEELFKKHKIVAVLRANSVEEAKKKALAVFL<br>GGVHLIEITFTVPDADTVIKELSFLKEMGAIIGAGTIVTSVEQCRKAVESG<br>AEFIVSPHLDEEISQFCKEKGVFYMPGVMTPTTELVKAMKLGHTILKLFPG<br>EVLGPPQFVKAMKGFPPNVKVFVPTGGVNLNDNVCEWFKAGVLAVGVGSALVK<br>GTPVEVAEKAKAFVEKIRGCTEQKLISEEDLGS GSGDGGGRGSRGGDGS GG<br>SSGPTAPPEYGGG                                               |
| EPN-44 | MGARASGSKSGSGSDSGSKIEELFKKHKIVAVLRANSVEEAKKKALAVFL<br>GGVHLIEITFTVPDADTVIKELSFLKEMGAIIGAGTIVTSVEQCRKAVESG<br>AEFIVSPHLDEEISQFCKEKGVFYMPGVMTPTTELVKAMKLGHTILKLFPG<br>EVLGPPQFVKAMKGFPPNVKVFVPTGGVNLNDNVCEWFKAGVLAVGVGSALVK<br>GTPVEVAEKAKAFVEKIRGCTEQKLISEEDLGS GSGDGGGRGSRGGDGS GG<br>SSGPTAPGGG                                                  |
| EPN-45 | MGARASGSKSGSGSDSGSKIEELFKKHKIVAVLRANSVEEAKKKALAVFL<br>GGVHLIEITFTVPDADTVIKELSFLKEMGAIIGAGTIVTSVEQCRKAVESG<br>AEFIVSPHLDEEISQFCKEKGVFYMPGVMTPTTELVKAMKLGHTILKLFPG<br>EVLGPPQFVKAMKGFPPNVKVFVPTGGVNLNDNVCEWFKAGVLAVGVGSALVK<br>GTPVEVAEKAKAFVEKIRGCTEQKLISEEDLGS GSGDGGGRGSRGGDGS GG<br>SSGPPEYGGG                                                  |
| EPN-46 | MGARASGSKSGSGSDSGSKIEELFKKHKIVAVLRANSVEEAKKKALAVFL<br>GGVHLIEITFTVPDADTVIKELSFLKEMGAIIGAGTIVTSVEQCRKAVESG<br>AEFIVSPHLDEEISQFCKEKGVFYMPGVMTPTTELVKAMKLGHTILKLFPG<br>EVLGPPQFVKAMKGFPPNVKVFVPTGGVNLNDNVCEWFKAGVLAVGVGSALVK                                                                                                                         |



|                           |                                                                                                                                                                                                                                                                                                                                                                                                                           |
|---------------------------|---------------------------------------------------------------------------------------------------------------------------------------------------------------------------------------------------------------------------------------------------------------------------------------------------------------------------------------------------------------------------------------------------------------------------|
|                           | GTPVEVAEKAKAFVEKIRGCTEQKLI SEEDLGSGSGDGGGRGSRGGDGS GG<br>SSGYPLTSLGGS                                                                                                                                                                                                                                                                                                                                                     |
| EPN-47                    | MGARASGSKSGSGSDSGSKIEELFKKHKIVAVLRANSVEEAKKKALAVFL<br>GGVHLIEITFTVPDADTVIKELSFLKEMGAIIGAGTVTSVEQCRKAVESG<br>AEFIVSPHLDEEISQFCKEKGVFYMPGVMTPTELVKAMKLGHTILKLFPG<br>EVVGPQFVKAMKGF PNVK FVPTGGVNL DNVCEWFKAGVLAVGVGSALVK<br>GTPVEVAEKAKAFVEKIRGCTEQKLI SEEDLGSGSGDGGGRGSRGGDGS GG<br>SSGYPLGGS                                                                                                                              |
| EPN-48                    | MGARASGSKSGSGSDSGSKIEELFKKHKIVAVLRANSVEEAKKKALAVFL<br>GGVHLIEITFTVPDADTVIKELSFLKEMGAIIGAGTVTSVEQCRKAVESG<br>AEFIVSPHLDEEISQFCKEKGVFYMPGVMTPTELVKAMKLGHTILKLFPG<br>EVVGPQFVKAMKGF PNVK FVPTGGVNL DNVCEWFKAGVLAVGVGSALVK<br>GTPVEVAEKAKAFVEKIRGCTEQKLI SEEDLGSGSGDGGGRGSRGGDGS GG<br>SSGFPIVGGG                                                                                                                             |
| EPN-49 (negative control) | MAARASGSGSSQAIGILELTSIAAGMELGDAMLKSANVDLLVSKTISP GK<br>FLLMLGGDIGAIQQAIETGTSQAGELLVDSLVLANIHPVLP AISGLNSV<br>DKRQAVGIVETWSVAACISAADRAVKGSNVT LVRVHMAFGIGGKCYMVVA<br>GDVSDVALAVTVASSAGAYGLLVYASLI PRPHEAMWRQMVEGQKLI SEE<br>DLLQSRPEPTAPPEESFRSGVETTTTPPKQEPIDKELYPLTSLRSLFGND<br>PSSQ                                                                                                                                     |
| EPN-50                    | MGARASGSGSSQAIGILELTSIAAGMELGDAMLKSANVDLLVSKTISP GK<br>FLLMLGGDIGAIQQAIETGTSQAGELLVDSLVLANIHPVLP AISGLNSV<br>DKRQAVGIVETWSVAACISAADRAVKGSNVT LVRVHMAFGIGGKCYMVVA<br>GDVSDVALAVTVASSAGAYGLLVYASLI PRPHEAMWRQMVEGQKLI SEE<br>DLLQSRPEPTAPPEESFRSGVETTTTPPKQEPIDKELYPLTSLRSLFGND<br>PSSQ                                                                                                                                     |
| EPN-51                    | MLQSRPEPTAPPEESFRSGVETTTTPPKQEPIDKELYPLTSLRSLFGNDP<br>SSQSQAIGILELTSIAAGMELGDAMLKSANVDLLVSKTISP GK FLLMLGG<br>DIGAIQQAIETGTSQAGELLVDSLVLANIHPVLP AISGLNSV DKRQAVG<br>IVETWSVAACISAADRAVKGSNVT LVRVHMAFGIGGKCYMVVAGDVSDVA<br>LAVTVASSAGAYGLLVYASLI PRPHEAMWRQMVEGQKLI SEEDLHGLQD<br>DPDLQALLKGSQLLKVKSSSWRRERFYKLQEDCKTIWQESRKVMRSPESQ<br>LFSIEDIQEVRMGHRTEGLEKFARDI PEDRCFSIVFKDQRNTLDLIAPSP<br>ADAQHVVQGLRKIIHHSGSMDQRQK |

**Supplementary Table 3 | Expression constructs and antibodies used in this study.**  
**3A Mammalian Expression constructs**

| Plasmid Name                       | Source    | Mutation                                                          | Epitope Tags | Addgene ID |
|------------------------------------|-----------|-------------------------------------------------------------------|--------------|------------|
| pCMV-I3-01-Myc                     |           |                                                                   | Myc          | 80038      |
| pCMV-EPN-01*                       |           |                                                                   | Myc          | 80039      |
| pCMV-EPN-01*( $\Delta$ M)          |           | G <sub>1</sub> A                                                  | Myc          | 80040      |
| pCMV-EPN-01*( $\Delta$ I)          |           | L <sub>33</sub> R                                                 | Myc          | 80041      |
| pCMV-EPN-01*( $\Delta$ L1)         |           | PTAP <sub>10</sub> AAAA                                           | Myc          | 80042      |
| pCMV-EPN-01*( $\Delta$ L2)         |           | YP <sub>36</sub> AA                                               | Myc          | 80043      |
| pCMV-EPN-01*( $\Delta$ L1+L2)      |           | PTAP <sub>10</sub> AAAA,<br>YP <sub>36</sub> AA                   | Myc          | 80044      |
| pCMV-EPN-01*( $\Delta$ LF)         |           | LF <sub>45</sub> AA                                               | Myc          | 80045      |
| pCMV-EPN-01                        |           | M <sub>3</sub> I                                                  | Myc          | 80046      |
| pCMV-EPN-01( $\Delta$ M)           |           | G <sub>1</sub> A, M <sub>3</sub> I                                | Myc          | 80047      |
| pCMV-EPN-01( $\Delta$ I)           |           | M <sub>3</sub> I, L <sub>33</sub> R                               | Myc          | 80048      |
| pCMV-EPN-01( $\Delta$ L1)          |           | M <sub>3</sub> I, PTAP <sub>10</sub> AAAA                         | Myc          | 80049      |
| pCMV-EPN-01( $\Delta$ L2)          |           | M <sub>3</sub> I, YP <sub>36</sub> AA                             | Myc          | 80050      |
| pCMV-EPN-01( $\Delta$ L1+L2)       |           | M <sub>3</sub> I, PTAP <sub>10</sub> AAAA,<br>YP <sub>36</sub> AA | Myc          | 80051      |
| pCMV-EPN-01-( $\Delta$ LF)         |           | M <sub>3</sub> I, LF <sub>45</sub> AA                             | Myc          | 80052      |
| pMM310-Myc                         | Refs. 2,3 |                                                                   | Myc          | 80053      |
| pCMV-VSV-G-Myc                     | Ref. 4    |                                                                   | Myc          | 80054      |
| pCMV-VSV-G(P <sub>127</sub> D)-Myc | Ref. 4    |                                                                   | Myc          | 80055      |
| pEGFP-VPS4A(E <sub>228</sub> Q)    | Ref. 5    |                                                                   | Myc          | 80351      |
| pCMV-EPN-01†                       |           |                                                                   | Myc          | 79916      |
| pCMV-EPN-02                        |           | G <sub>2</sub> A                                                  | Myc          | 79917      |
| pCMV-EPN-03                        |           |                                                                   | Myc          | 79918      |

|             |  |                |     |       |
|-------------|--|----------------|-----|-------|
| pCMV-EPN-04 |  |                | Myc | 79919 |
| pCMV-EPN-05 |  |                | Myc | 79920 |
| pCMV-EPN-06 |  |                | Myc | 79921 |
| pCMV-EPN-07 |  |                | Myc | 79922 |
| pCMV-EPN-08 |  |                | Myc | 79923 |
| pCMV-EPN-09 |  |                | Myc | 79924 |
| pCMV-EPN-10 |  |                | Myc | 79925 |
| pCMV-EPN-11 |  |                | Myc | 79926 |
| pCMV-EPN-12 |  |                | Myc | 79927 |
| pCMV-EPN-13 |  |                | Myc | 79928 |
| pCMV-EPN-14 |  |                | Myc | 79929 |
| pCMV-EPN-15 |  |                | Myc | 79930 |
| pCMV-EPN-16 |  |                | Myc | 79931 |
| pCMV-EPN-17 |  | No late domain | Myc | 79932 |
| pCMV-EPN-18 |  |                | Myc | 79933 |
| pCMV-EPN-19 |  |                | Myc | 79934 |
| pCMV-EPN-20 |  |                | Myc | 79935 |
| pCMV-EPN-21 |  |                | Myc | 79936 |
| pCMV-EPN-22 |  |                | Myc | 79937 |
| pCMV-EPN-23 |  |                | Myc | 79938 |

|             |  |                |     |       |
|-------------|--|----------------|-----|-------|
| pCMV-EPN-24 |  |                | Myc | 79939 |
| pCMV-EPN-25 |  |                | Myc | 79940 |
| pCMV-EPN-26 |  |                | Myc | 79941 |
| pCMV-EPN-27 |  | No late domain | Myc | 79942 |
| pCMV-EPN-28 |  |                | Myc | 79943 |
| pCMV-EPN-29 |  |                | Myc | 79944 |
| pCMV-EPN-30 |  | No late domain | Myc | 79945 |
| pCMV-EPN-31 |  |                | Myc | 79946 |
| pCMV-EPN-32 |  |                | Myc | 79947 |
| pCMV-EPN-33 |  | No late domain | Myc | 79948 |
| pCMV-EPN-34 |  |                | Myc | 79949 |
| pCMV-EPN-35 |  |                | Myc | 79950 |
| pCMV-EPN-36 |  |                | Myc | 79951 |
| pCMV-EPN-37 |  |                | Myc | 79952 |
| pCMV-EPN-38 |  |                | Myc | 79953 |
| pCMV-EPN-39 |  |                | Myc | 79954 |
| pCMV-EPN-40 |  |                | Myc | 79955 |
| pCMV-EPN-41 |  |                | Myc | 79956 |
| pCMV-EPN-42 |  |                | Myc | 79957 |
| pCMV-EPN-43 |  |                | Myc | 79958 |

|                          |  |                                                 |     |       |
|--------------------------|--|-------------------------------------------------|-----|-------|
| pCMV-EPN-44              |  |                                                 | Myc | 79959 |
| pCMV-EPN-45              |  |                                                 | Myc | 79960 |
| pCMV-EPN-46              |  |                                                 | Myc | 79961 |
| pCMV-EPN-47              |  |                                                 | Myc | 79962 |
| pCMV-EPN-48              |  |                                                 | Myc | 79963 |
| pCMV-EPN-51              |  |                                                 | Myc | 79966 |
| pCMV-EPN-03( $\Delta$ M) |  | G <sub>2</sub> A                                | Myc | 80104 |
| pCMV-EPN-07( $\Delta$ M) |  | G <sub>2</sub> A, C <sub>3</sub> A              | Myc | 80105 |
| pCMV-EPN-08( $\Delta$ M) |  | G <sub>2</sub> A, C <sub>3</sub> A              | Myc | 80106 |
| pCMV-EPN-18( $\Delta$ M) |  | R <sub>40</sub> A                               | Myc | 80107 |
| pCMV-EPN-51( $\Delta$ L) |  | PTAP <sub>10</sub> AAAA,<br>YP <sub>37</sub> AA | Myc | 80108 |
| pCMV-EPN-51( $\Delta$ M) |  | R <sub>40</sub> A                               | Myc | 80109 |
| pCMV-EPN-51( $\Delta$ I) |  | A <sub>167</sub> R                              | Myc | 80110 |

† To simplify cloning, the version of EPN-01 used in Extended Data Fig. 8 was cloned into pCMV using the *KpnI* restriction site at the 5' end of the insert, while the EPN-01/EPN-01\* constructs used in Figures 1-3 were cloned into pCMV using the *NotI* restriction site at the 5' end.

### 3B Bacterial expression constructs

| Plasmid Name                                 | Source | Mutation                                        | Epitope Tags | Addgene ID |
|----------------------------------------------|--------|-------------------------------------------------|--------------|------------|
| pET29b-EPN-01*                               |        |                                                 | Myc          | 80423      |
| pET29b-EPN-01*-His                           |        |                                                 | Myc, His     | 84509      |
| pET29b-EPN-01( $\Delta$ M)-His               |        | G <sub>2</sub> A                                | Myc, His     | 84510      |
| pET29b-EPN-01( $\Delta$ L1+ $\Delta$ L2)-His |        | PTAP <sub>10</sub> AAAA,<br>YP <sub>37</sub> AA | Myc, His     | 84511      |

**Supplementary Table 4 | Antibodies**

| Antigen     | Species | Membrane            | Blocking          | Dilution | Source                           |
|-------------|---------|---------------------|-------------------|----------|----------------------------------|
| Myc         | mouse   | PVDF/Nitrocellulose | 5% milk/0.5% milk | 5,000    | EMD Millipore (05-724)           |
| GAPDH       | mouse   | PVDF                | 5% milk           | 10,000   | EMD Millipore (MAB374)           |
| Actin       | goat    | Nitrocellulose      | 0.5% milk         | 200      | Santa Cruz Biotech. (sc-1615)    |
| ALIX        | rabbit  | Nitrocellulose      | 0.5% milk         | 500      | Covance (UT324)                  |
| Myc-Agarose | rabbit  |                     |                   |          | Sigma (A7470)                    |
| IgG-Agarose | rabbit  |                     |                   |          | Sigma (A2909)                    |
| Myc         | mouse   | Nitrocellulose      | 0.5% milk         | 20,000   | Cell Signaling Technology (2276) |

## Supplementary References

- 1 Resh, M. D. Fatty acylation of proteins: new insights into membrane targeting of myristoylated and palmitoylated proteins. *Biochimica et Biophysica Acta (BBA) - Molecular Cell Research* **1451**, 1-16, doi:10.1016/s0167-4889(99)00075-0 (1999).
- 2 Tobiume, M., Lineberger, J. E., Lundquist, C. A., Miller, M. D. & Aiken, C. Nef does not affect the efficiency of human immunodeficiency virus type 1 fusion with target cells. *J Virol* **77**, 10645-10650 (2003).
- 3 Cavrois, M., De Noronha, C. & Greene, W. C. A sensitive and specific enzyme-based assay detecting HIV-1 virion fusion in primary T lymphocytes. *Nature biotechnology* **20**, 1151-1154, doi:10.1038/nbt745 (2002).
- 4 Yee, J. K., Friedmann, T. & Burns, J. C. Generation of high-titer pseudotyped retroviral vectors with very broad host range. *Methods Cell Biol* **43 Pt A**, 99-112 (1994).
- 5 von Schwedler, U. K. *et al.* The protein network of HIV budding. *Cell* **114**, 701-713 (2003).
