# Supplementary material
Source: PubMed Central journal article supplement (PMC5729044)

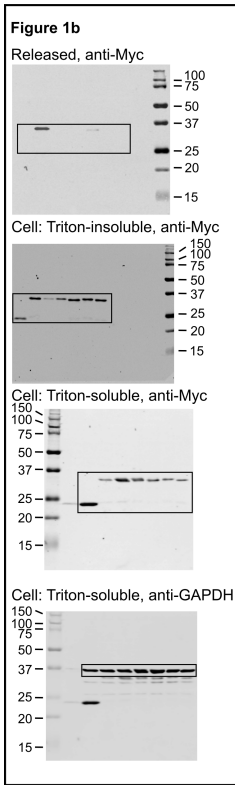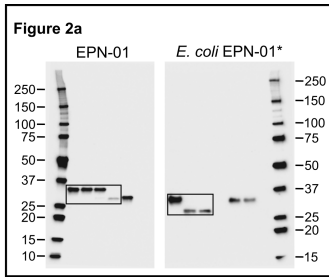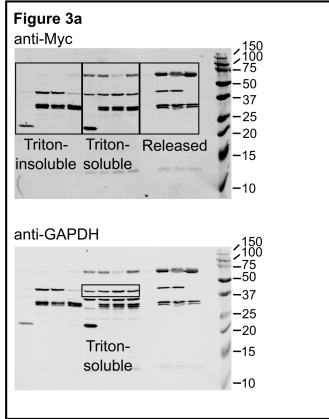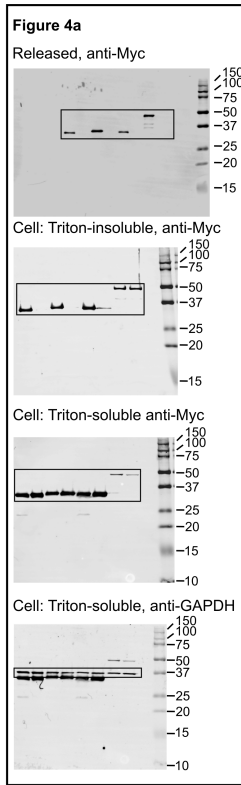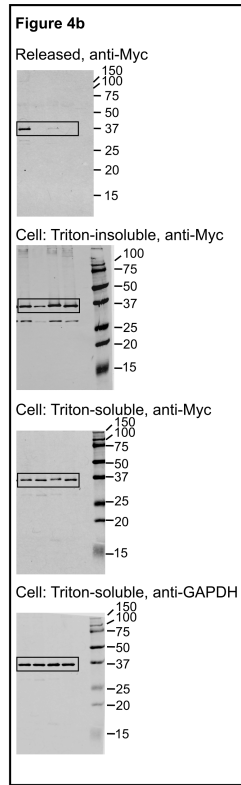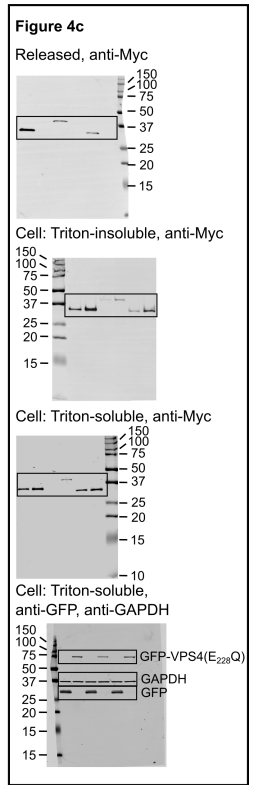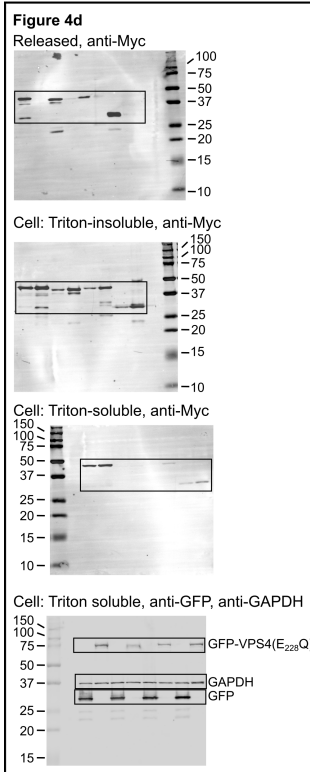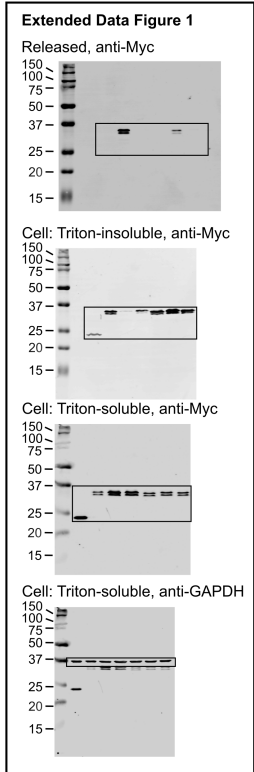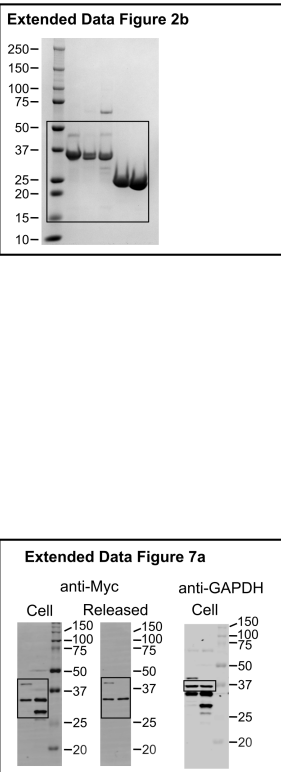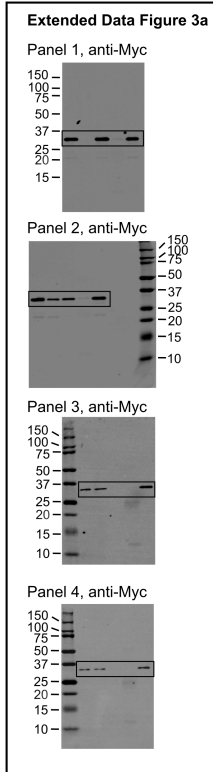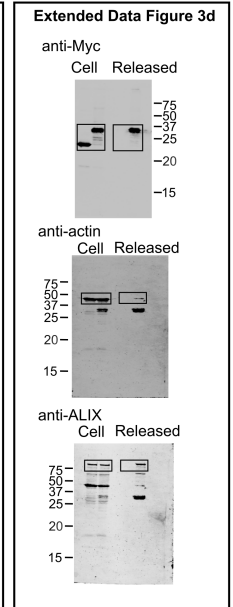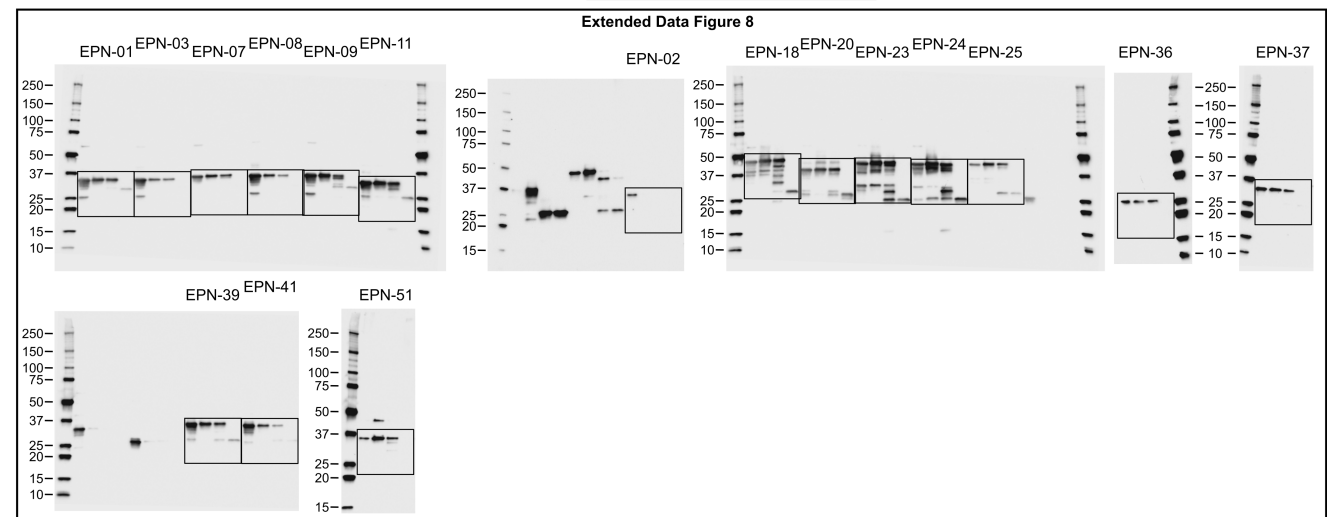

Supplement: NIHMS875234-supplement-Sup_Fig_1_v2.pdf [file NIHMS875234-supplement-Sup_Fig_1_v2.pdf]
